# Supplementary material
Source: MDPI journal article supplement (https://www.mdpi.com/2073-4395/14/3/493)
Supplement: s1 [file s1]

## Supplementary Material

**Table S1** Cross-validation statistics of the Flexible Discriminant Analysis (FDA) for the training hyperspectral dataset collected on tomato leaflet tissues (transmittance) and kiwi leaf tissues (reflectance).

| <i>Class</i>                                                                                                                                                                        | <i>Accuracy (%)</i> | <i>Kappa</i> | <i>Precision (%)</i> | <i>Sensitivity (%)</i> | <i>Specificity (%)</i> | <i>F1 (%)</i> |
|-------------------------------------------------------------------------------------------------------------------------------------------------------------------------------------|---------------------|--------------|----------------------|------------------------|------------------------|---------------|
| <i>Tomato (1643 observations)</i>                                                                                                                                                   |                     |              |                      |                        |                        |               |
| Con                                                                                                                                                                                 | 63.60               | 45.22        | 52.93                | 73.37                  | 77.23                  | 67.75         |
| Pst                                                                                                                                                                                 |                     |              | 77.53                | 67.78                  | 91.18                  | 72.33         |
| Xeu                                                                                                                                                                                 |                     |              | 52.89                | 50.09                  | 76.49                  | 51.45         |
| <i>Kiwi (354 observations)</i>                                                                                                                                                      |                     |              |                      |                        |                        |               |
| NS/S                                                                                                                                                                                | 74.58               | 48.16        | 72.79                | 68.15                  | 79.70                  | 70.39         |
| Con—Control (healthy), Pst—Inoculated with <i>Pseudomonas syringae</i> pv. <i>tomato</i> , Xeu—Inoculated with <i>Xanthomonas euvesicatoria</i> , NS—nonsymptomatic, S—symptomatic. |                     |              |                      |                        |                        |               |
